# Supplementary material
Source: publisher figshare collection journal article supplement (https://asha.figshare.com/articles/dataset/_/22714222)
Supplement: Supplementary file 1 [file 1]

**Supplemental Material S5.** Comparison of responses to quantitative questions by membership in a diversity-related professional group.

| Question                                                                                                                                      | Response                                                        | YES         | NO          | $\chi^2$ | df   | p    |
|-----------------------------------------------------------------------------------------------------------------------------------------------|-----------------------------------------------------------------|-------------|-------------|----------|------|------|
| Overall, White clients and family members receive...                                                                                          | Better services than BIPOC clients/families                     | 11 (55.0%)  | 28 (33.3%)  | 3.43     | 3    | .180 |
|                                                                                                                                               | Same quality services/worse services/ did not pay attention     | 8 (40.0%)   | 46 (54.8%)  |          |      |      |
|                                                                                                                                               | No exposure to BIPOC clients                                    | 1 (5.0%)    | 10 (11.9%)  |          |      |      |
| In general, a difference between the race of the client and the clinician makes...                                                            | A great deal of difference in quantity/quality of services      | 4 (20.0%)   | 20 (23.8%)  | 1.36     | 3    | .716 |
|                                                                                                                                               | Some difference in quantity/quality of services                 | 8 (40.0%)   | 41 (48.8%)  |          |      |      |
|                                                                                                                                               | No difference in quantity/quality of services                   | 4 (20.0%)   | 10 (11.9%)  |          |      |      |
|                                                                                                                                               | No basis for comparison                                         | 4 (20.0%)   | 13 (15.5%)  |          |      |      |
| In professional marketing and educational materials, White families are...                                                                    | Overrepresented                                                 | 15 (75.0%)  | 69 (82.1%)  | 0.53     | 1    | .466 |
|                                                                                                                                               | Underrepresented/appropriately represented/do not pay attention | 5 (25.0%)   | 15 (17.9%)  |          |      |      |
| All else being equal, White professionals are given...                                                                                        | More credibility than colleagues of color                       | 16 (80.0%)  | 47 (56.0%)  | 4.60     | 2    | .100 |
|                                                                                                                                               | Same/less credibility than colleagues of color                  | 3 (15.0%)   | 17 (20.2%)  |          |      |      |
|                                                                                                                                               | No basis for comparison                                         | 1 (5.0%)    | 20 (23.8%)  |          |      |      |
| In comparison to White students, graduate students of color in professional training programs have...                                         | Additional challenges                                           | 11 (55.0%)  | 51 (60.7%)  | 0.43     | 2    | .806 |
|                                                                                                                                               | Different challenges                                            | 5 (25.0%)   | 21 (25.0%)  |          |      |      |
|                                                                                                                                               | Fewer challenges/same challenges                                | 4 (20.0%)   | 12 (14.3%)  |          |      |      |
| White clients and families are able to access speech path/audiology services...                                                               | More easily than clients of color                               | 16 (80.0%)  | 58 (69.0%)  | 1.05     | 2    | .591 |
|                                                                                                                                               | Same ease/less ease than clients of color                       | 3 (15.0%)   | 17 (20.2%)  |          |      |      |
|                                                                                                                                               | No basis for comparison                                         | 1 (5.0%)    | 9 (10.7%)   |          |      |      |
| Question                                                                                                                                      |                                                                 | YES         | NO          | t        | df   | p    |
| The structure of our health care system disproportionately benefits White clients and families. (0 = strongly disagree, 100 = strongly agree) |                                                                 | 76.2 (30.4) | 77.2 (24.4) | -0.18    | 99   | .858 |
| Race makes a difference in service delivery. (0 = strongly disagree, 100 = strongly agree)                                                    |                                                                 | 55.4 (42.4) | 57.1 (28.8) | -0.16    | 21.2 | .875 |

*Note.* Top portion of the table displays  $\chi^2$  analyses for survey questions with categorical responses. Cells include the count and percentage of individuals who did and did not indicate membership in a diversity-related professional group who selected each answer. Bottom portion of the table displays *t*-test results comparing responses by program on survey questions with visual analog scale responses. Values are reported as mean (standard deviation) by group membership.
