# Supplementary material
Source: publisher figshare collection journal article supplement (https://asha.figshare.com/articles/dataset/_/22714222)
Supplement: Supplementary file 2 [file 1]

**Supplemental Material S6.** Comparison of responses to quantitative questions by professional program.

| Question                                                                                                                                      | Response                                                        | AUD         | SLP         | $\chi^2$ | df | p    |
|-----------------------------------------------------------------------------------------------------------------------------------------------|-----------------------------------------------------------------|-------------|-------------|----------|----|------|
| Overall, White clients and family members receive...                                                                                          | Better services than BIPOC clients/families                     | 7 (35.0%)   | 32 (38.1%)  | 1.08     | 2  | .583 |
|                                                                                                                                               | Same quality /worse services/ did not pay attention             | 12 (60.0%)  | 42 (50.5%)  |          |    |      |
|                                                                                                                                               | No exposure to BIPOC clients                                    | 1 (5.0%)    | 10 (11.9%)  |          |    |      |
| In general, a difference between the race of the client and the clinician makes...                                                            | A great deal of difference in quantity/quality of services      | 2 (10.0%)   | 12 (14.3%)  | 3.74     | 3  | .291 |
|                                                                                                                                               | Some difference in quantity/quality of services                 | 10 (50.0%)  | 39 (46.4%)  |          |    |      |
|                                                                                                                                               | No difference in quantity/quality of services                   | 7 (35.0%)   | 17 (20.2%)  |          |    |      |
|                                                                                                                                               | No basis for comparison                                         | 1 (5.0%)    | 16 (19.0%)  |          |    |      |
| In professional marketing and educational materials, White families are...                                                                    | Overrepresented                                                 | 15 (75.0%)  | 69 (82.1%)  | 0.53     | 1  | .466 |
|                                                                                                                                               | Underrepresented/appropriately represented/do not pay attention | 5 (25.0%)   | 15 (17.9%)  |          |    |      |
| All else being equal, White professionals are given...                                                                                        | More credibility than colleagues of color                       | 10 (50.0%)  | 53 (63.1%)  | 1.17     | 2  | .557 |
|                                                                                                                                               | Same/less credibility than colleagues of color                  | 5 (25.0%)   | 15 (17.9%)  |          |    |      |
|                                                                                                                                               | No basis for comparison                                         | 5 (25.0%)   | 16 (19.0%)  |          |    |      |
| In comparison to White students, graduate students of color in professional training programs have...                                         | Additional challenges                                           | 12 (60.0%)  | 50 (59.5%)  | <0.01    | 2  | .999 |
|                                                                                                                                               | Different challenges                                            | 5 (25.0%)   | 13 (15.5%)  |          |    |      |
|                                                                                                                                               | Fewer challenges/same challenges                                | 3 (15.0%)   | 21 (25.0%)  |          |    |      |
| White clients and families are able to access speech path/audiology services...                                                               | More easily than clients of color                               | 13 (65.0%)  | 61 (72.6%)  | 2.17     | 2  | .337 |
|                                                                                                                                               | Same ease/less ease than clients of color                       | 6 (30.0%)   | 14 (16.7%)  |          |    |      |
|                                                                                                                                               | No basis for comparison                                         | 1 (5.0%)    | 9 (10.7%)   |          |    |      |
| Question                                                                                                                                      |                                                                 | AUD         | SLP         | t        | df | p    |
| The structure of our health care system disproportionately benefits White clients and families. (0 = strongly disagree, 100 = strongly agree) |                                                                 | 78.2 (27.0) | 76.8 (25.1) | 0.21     | 99 | .833 |
| Race makes a difference in service delivery. (0 = strongly disagree, 100 = strongly agree)                                                    |                                                                 | 48.3 (29.9) | 58.9 (32.0) | -1.27    | 87 | .207 |

*Note.* Top portion of the table displays  $\chi^2$  analyses for survey questions with categorical responses. Cells include the count and percentage of individuals within each professional program who selected each answer. Bottom portion of the table displays *t*-test results comparing responses by program on survey questions with visual analog scale responses. Values are reported as mean (standard deviation) by program.
