# Supplementary material
Source: publisher figshare collection journal article supplement (https://asha.figshare.com/articles/dataset/_/22714222)
Supplement: Supplementary file 3 [file 1]

**Supplemental Material S3.** Demographic characteristics of respondents who discontinued the survey compared to those who completed quantitative questions.

| Variable             | Value                     | Continued   | Demographic only | $\chi^2$          | df | p    |
|----------------------|---------------------------|-------------|------------------|-------------------|----|------|
| Program              | AUD                       | 29 (19.3%)  | 2 (8.0%)         | 1.88              | 1  | .169 |
|                      | SLP                       | 121 (80.7%) | 23 (92.0%)       |                   |    |      |
| Geographic region    | Midwest                   | 46 (30.7%)  | 4 (16.0%)        | 12.68             | 3  | .005 |
|                      | Northeast                 | 26 (17.3%)  | 12 (48.0%)       |                   |    |      |
|                      | South                     | 39 (26.0%)  | 3 (12.0%)        |                   |    |      |
|                      | West                      | 39 (26.0%)  | 6 (24.0%)        |                   |    |      |
| Geographic area size | Large metro               | 45 (30.0%)  | 6 (25.0%)        | 0.94              | 3  | .816 |
|                      | Medium metro              | 66 (44.0%)  | 10 (41.7%)       |                   |    |      |
|                      | Small metro               | 28 (18.7%)  | 5 (20.8%)        |                   |    |      |
|                      | Rural                     | 11 (7.3%)   | 3 (12.5%)        |                   |    |      |
| Gender               | Man                       | 11          | 1                | NA <sup>a</sup>   | NA | NA   |
|                      | Woman                     | 133         | 24               |                   |    |      |
|                      | Nonbinary                 | 6           | 0                |                   |    |      |
|                      | Transgender               | 4           | 0                |                   |    |      |
|                      | Cisgender                 | 24          | 2                |                   |    |      |
|                      | Prefer not to say         | 1           | 0                |                   |    |      |
| Hispanic/Latinx      | Yes                       | 25 (16.7%)  | 3 (12.0%)        | 0.35              | 1  | .556 |
|                      | No                        | 125 (83.3%) | 22 (88.0%)       |                   |    |      |
| Professional Group   | Yes                       | 31 (20.7%)  | 2 (8.0%)         | 2.25              | 1  | .134 |
|                      | No                        | 119 (79.3%) | 23 (92.0%)       |                   |    |      |
| Racial Category      | Asian                     | 10 (83.2%)  | 2 (16.7%)        | 1.12 <sup>b</sup> | 4  | .891 |
|                      | Black or African American | 9 (90.0%)   | 1 (10.0%)        |                   |    |      |
|                      | White                     | 118 (84.9%) | 21 (15.9%)       |                   |    |      |
|                      | More than one             | 5 (83.3%)   | 1 (16.7%)        |                   |    |      |
|                      | Not listed                | 5 (100%)    | 0 (0.0%)         |                   |    |      |
|                      | Did not specify           | 3 (7.7%)    | 36 (92.3%)       |                   |    |      |

*Note.* The “Continued” group includes respondents who answered at least one quantitative question and the “Demographic only” group includes respondents who answered demographic questions but discontinued the survey without answering any quantitative questions. Each cell includes the count of individuals and the percentage within the continued or demographic-only group.

a.  $\chi^2$  test was not conducted for gender because categories were not exclusive and counts were 2 or less for all categories except one (Woman) in the demographic-only group.

b. The  $\chi^2$  test for racial categories excludes the ‘did not specify’ category as the high proportion of ‘did not specify’ in the demographic-only group may reflect individuals who discontinued the survey rather than declined to report race specifically. When the “did not specify” group is included in the comparison, the result is significant,  $\chi^2(5) = 94.2, p < .001$ .
