# Supplementary material
Source: publisher figshare collection journal article supplement (https://asha.figshare.com/articles/dataset/_/22714222)
Supplement: Supplementary file 5 [file 1]

**Supplemental Material S1.** Detailed comparison of questions that changed from Ebert (2013) survey in the present survey.

| Ebert (2013) survey question                                   | Current survey question                                                                                                                                                                                                                                                                                                                                                                                                                                                                                                                                                                                                                                  | Changes                                                                            |
|----------------------------------------------------------------|----------------------------------------------------------------------------------------------------------------------------------------------------------------------------------------------------------------------------------------------------------------------------------------------------------------------------------------------------------------------------------------------------------------------------------------------------------------------------------------------------------------------------------------------------------------------------------------------------------------------------------------------------------|------------------------------------------------------------------------------------|
| 4. Gender<br>Male<br>Female                                    | 4. Gender (check all that apply)<br>Woman<br>Man<br>Cisgender<br>Transgender<br>Non-binary<br>Not listed<br>Prefer not to say                                                                                                                                                                                                                                                                                                                                                                                                                                                                                                                            | More gender descriptors added, ability to choose multiple markers                  |
| 6. Are you of Hispanic, Latino or Spanish origin?<br>Yes<br>No | 6. Are you of Hispanic or Latinx origin?<br>Yes<br>No                                                                                                                                                                                                                                                                                                                                                                                                                                                                                                                                                                                                    | Removed Spanish from question for consistency with current demographic descriptors |
|                                                                | 10. In what ways have you learned about White privilege and systemic racism as it pertains to the fields of speech pathology and audiology (check all that apply)<br>a. Throughout the curriculum in my program<br>b. Through a class dedicated to culturally responsive practice<br>c. Through optional and/or supplemental opportunities through my program (e.g., an optional certificate, workshop, presentation, etc.)<br>d. Through opportunities I pursued independently (e.g., attending a presentation outside of your department, reading relevant materials independently, etc.)<br>e. I have not had the opportunity to explore these issues | Question added to current survey                                                   |

|                                                                                                                                                                                                                                                                                                                                                                                                                                                                                                                                |                                                                                                                                                                                                                                                                                                                                                                                                                                                                                                                |                                                                                                                                                           |
|--------------------------------------------------------------------------------------------------------------------------------------------------------------------------------------------------------------------------------------------------------------------------------------------------------------------------------------------------------------------------------------------------------------------------------------------------------------------------------------------------------------------------------|----------------------------------------------------------------------------------------------------------------------------------------------------------------------------------------------------------------------------------------------------------------------------------------------------------------------------------------------------------------------------------------------------------------------------------------------------------------------------------------------------------------|-----------------------------------------------------------------------------------------------------------------------------------------------------------|
| 10. Overall, White clients and family members...<br>a. Receive better services than clients and families of color from SLPs and Audiologists<br>b. Receive worse services than clients and families of color from SLPs and Audiologists<br>c. Receive the same quality of services as clients and families of color from SLPs and Audiologists<br>d. I have only been exposed to White clients and family members<br>e. I did not pay attention to any differences between services to clients and families of different races | 11. Overall, White clients and family members receive...<br>a. Better services than clients and families of color from SLPs and Audiologists<br>b. Worse services than clients and families of color from SLPs and Audiologists<br>c. The same quality of services as clients and families of color from SLPs and Audiologists<br>d. I have only been exposed to White clients and family members<br>e. I did not pay attention to any differences between services to clients and families of different races | Moved verb into the question stem rather than within individual choices for clarity.                                                                      |
| 11. In general, a difference between the race of the client and the race of the clinician...<br>a. Makes no difference in the quantity or quality of services received.<br>b. Makes some difference in the quantity or quality of services received.<br>c. Makes a great deal of difference in the quantity or quality of services received.<br>d. I have no basis for comparison.                                                                                                                                             | 12. In general, a difference between the race of the client and the race of the clinician makes...<br>a. No difference in the quantity or quality of services received.<br>b. Some difference in the quantity or quality of services received.<br>c. A great deal of difference in the quantity or quality of services received.<br>d. I have no basis for comparison.                                                                                                                                         | Moved verb into the question stem rather than within individual choices for clarity.                                                                      |
| 13. All else being equal, white professionals have...<br>a. More credibility than colleagues of color.<br>b. Less credibility than colleagues of color.<br>c. The same credibility as colleagues of color.<br>d. I have no basis for comparison.                                                                                                                                                                                                                                                                               | 14. All else being equal, White professionals are given...<br>a. More credibility than colleagues of color<br>b. Less credibility than colleagues of color<br>c. The same credibility as colleagues of color<br>d. I have no basis for comparison                                                                                                                                                                                                                                                              | Changed to clarify that question asks about credibility actually offered rather than credibility the respondent believes White professionals should have. |
|                                                                                                                                                                                                                                                                                                                                                                                                                                                                                                                                | 16. The structure of our health care system disproportionately benefits White clients and families.<br>(0 = strongly disagree, 100 = strongly agree)<br>Visual analog scale (VAS) response                                                                                                                                                                                                                                                                                                                     | Question added to current survey                                                                                                                          |

|                                                                                                                                                                                                                                                                                                                                                                              |                                                                                                                                                                                                                                                                                                                                                                      |                                                                                                                                                 |
|------------------------------------------------------------------------------------------------------------------------------------------------------------------------------------------------------------------------------------------------------------------------------------------------------------------------------------------------------------------------------|----------------------------------------------------------------------------------------------------------------------------------------------------------------------------------------------------------------------------------------------------------------------------------------------------------------------------------------------------------------------|-------------------------------------------------------------------------------------------------------------------------------------------------|
|                                                                                                                                                                                                                                                                                                                                                                              | <p>17. White clients and families are able to access speech path/audiology services...</p> <ul style="list-style-type: none"> <li>a. With the same ease as clients and families of color</li> <li>b. Less easily than clients and families of color</li> <li>c. More easily than clients and families of color</li> <li>d. I have no basis for comparison</li> </ul> | Question added to current survey                                                                                                                |
| <p>15. In the work settings I have observed or trained in, approximately _____ % of professionals are White. (Consider "professionals" to mean all those who have are primary service providers, including physicians, teachers, social workers, nurses, psychologists, OTs, PTs etc. Do not consider paraprofessionals, interpreters, receptionists, custodians, etc.).</p> | <p>18. As far as I know, in the work settings I have observed or trained in, approximately _____ % of educators are White. (Consider "educators" to include all professors, supervisors, and instructors).</p> <p>Visual analog scale (VAS) response</p>                                                                                                             | <p>Questions were collapsed to reduce redundancy and survey length.</p> <p>Response type changed to VAS to increase precision of responses.</p> |
| <p>18. In my graduate training program _____ of clinical supervisors and instructors are White.</p> <ul style="list-style-type: none"> <li>a. 100%</li> <li>b. More than 90%</li> <li>c. About 75%</li> <li>d. Less than 50%</li> <li>e. Other (please specify) _____</li> </ul>                                                                                             |                                                                                                                                                                                                                                                                                                                                                                      |                                                                                                                                                 |
| <p>17. In my graduate training program _____ of other students are White.</p> <ul style="list-style-type: none"> <li>a. 100%</li> <li>b. More than 90%</li> <li>c. About 75%</li> <li>d. Less than 50%</li> <li>e. Other (please specify) _____</li> </ul>                                                                                                                   | <p>19. As far as I know, in my graduate training program _____ % of other students are White.</p> <p>Visual Analog Scale (VAS) response</p>                                                                                                                                                                                                                          | Response type was changed to VAS to increase precision of responses.                                                                            |

|                                                                                                                                    |                                                                                                                                                                   |                                                                                         |
|------------------------------------------------------------------------------------------------------------------------------------|-------------------------------------------------------------------------------------------------------------------------------------------------------------------|-----------------------------------------------------------------------------------------|
| 22. To what extent do you think White privilege has affected your own life, either positively or negatively?                       | 22. To what extent do you think White privilege and/or systemic racism has affected your own life, either positively or negatively?                               | Language added to include assessment of awareness about systemic racism within question |
| 23. Can you think of any ways that White privilege impacts training or service delivery in speech language pathology or audiology? | 23. Can you think of any ways that White privilege and/or systemic racism impact training or service delivery in speech language pathology or audiology?          | Language added to include assessment of awareness about systemic racism within question |
|                                                                                                                                    | 24. How do you think the impacts of White privilege and/or systemic racism differentially affect White clients and families versus clients and families of color? | Question added to current survey                                                        |

## Reference

Ebert, K. D. (2013). Perceptions of racial privilege in prospective speech-language pathologists and audiologists. *Perspectives on Communication Disorders and Sciences in Culturally and Linguistically Diverse (CLD) Populations*, 20(2), 60–71. <https://doi.org/10.1044/cds20.2.60>
