# Supplementary material
Source: publisher figshare collection journal article supplement (https://asha.figshare.com/articles/dataset/_/22714222)
Supplement: Supplementary file 6 [file 1]

## Supplemental Material S2. Categorization of multiple-choice responses by question.

| Categories         | Questions                                                                                               |                                                                                           |                                                                                |                                                               |                                                                                     |                                                                                        |
|--------------------|---------------------------------------------------------------------------------------------------------|-------------------------------------------------------------------------------------------|--------------------------------------------------------------------------------|---------------------------------------------------------------|-------------------------------------------------------------------------------------|----------------------------------------------------------------------------------------|
|                    | <i>Overall, White clients and family members receive...</i>                                             | <i>In general, a difference between the race of the client and the clinician makes...</i> | <i>White families are...</i>                                                   | <i>All else being equal, White professionals are given...</i> | <i>Graduate students of color in professional training programs have...</i>         | <i>White clients and families are able to access speech path/audiology services...</i> |
| Awareness          | Better services than clients and families of color from SLPs and Audiologists                           | A great deal of difference in the quality or quantity of services received                | Overrepresented in professional marketing and educational materials            | More credibility than colleagues of color                     | Additional challenges to White graduate students in professional training programs  | More easily than clients and families of color                                         |
| Limited awareness  | N/A                                                                                                     | Some difference in the quality or quantity of services received                           | N/A                                                                            | N/A                                                           | Different challenges than White graduate students in professional training programs | N/A                                                                                    |
| Active denial      | Worse services than clients and families of color from SLPs and Audiologists*                           | N/A                                                                                       | Underrepresented in professional marketing and educational materials*          | Less credibility than colleagues of color*                    | Fewer challenges than White graduate students in professional training programs*    | Less easily than clients and families of color*                                        |
| Color blindness    | The same quality of services as clients and families of color from SLPs and Audiologists*               | No difference in the quality or quantity of services received                             | Appropriately represented in professional marketing and educational materials* | The same credibility as colleagues of color*                  | The same challenges as White graduate students in professional training programs*   | With the same ease as clients and families of color*                                   |
| Lack of experience | I have only been exposed to White clients and family members                                            | I have no basis for comparison                                                            | N/A                                                                            | I have no basis for comparison                                | N/A                                                                                 | I have no basis for comparison                                                         |
| Lack of attention  | I did not pay attention to any differences between services to clients and families of different races* | N/A                                                                                       | I do not pay attention to race in marketing and educational materials*         | N/A                                                           | N/A                                                                                 | N/A                                                                                    |

*Note.* \*Marks response categories that were collapsed into “lack of awareness” category to meet Chi-square assumptions
